# Supplementary material
Source: HighWire-hosted journal article supplement (https://diabetes.diabetesjournals.org/content/suppl/2007/10/03/db07-1059)

Probands

Relatives

A

B

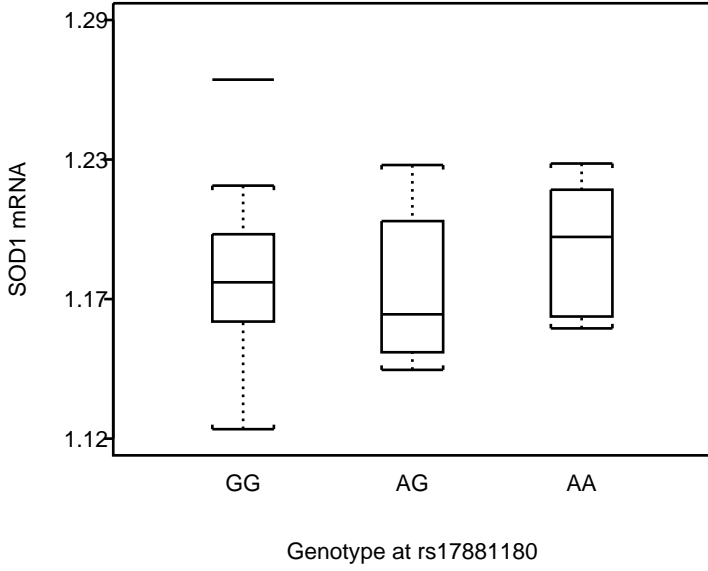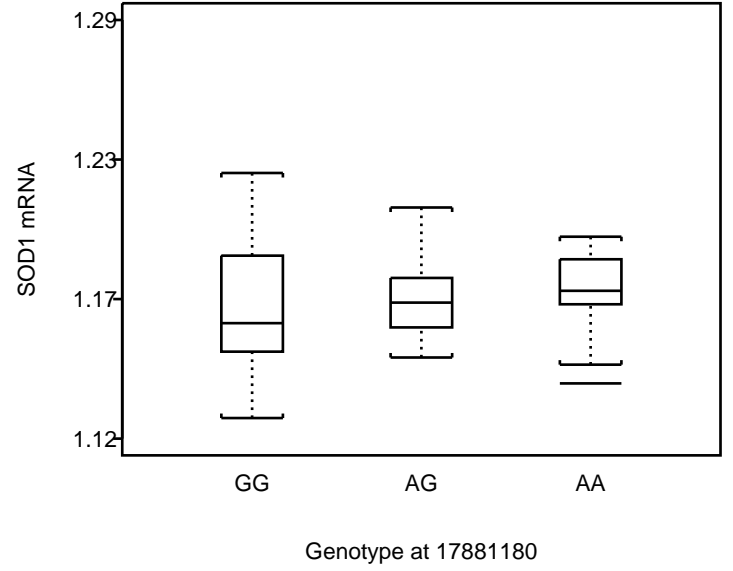

C

D

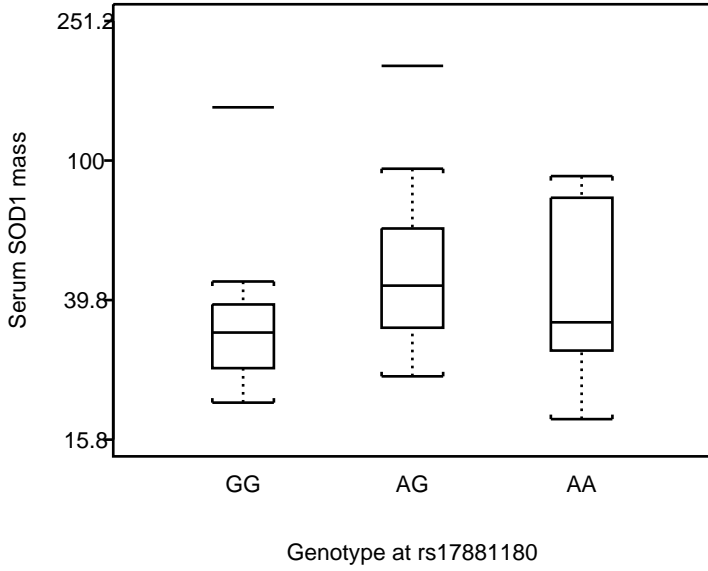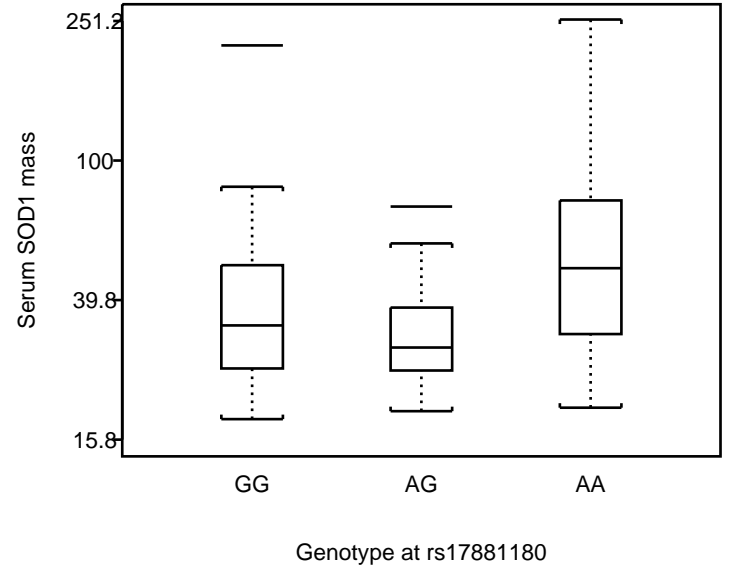

E

F

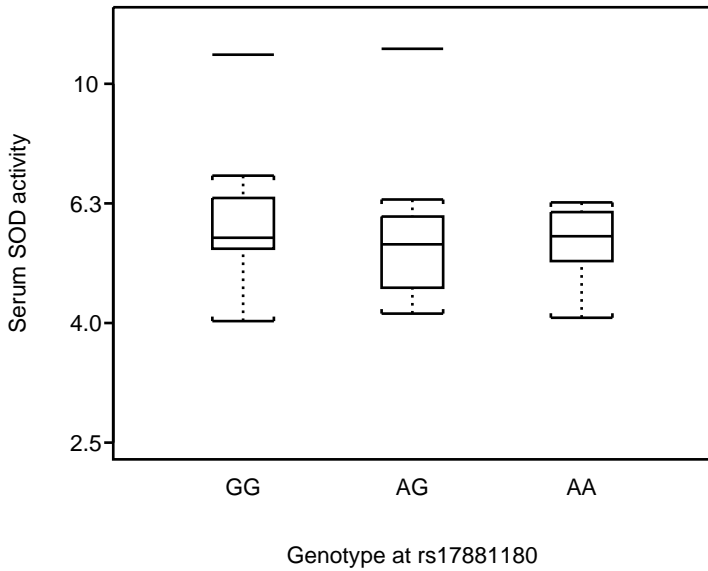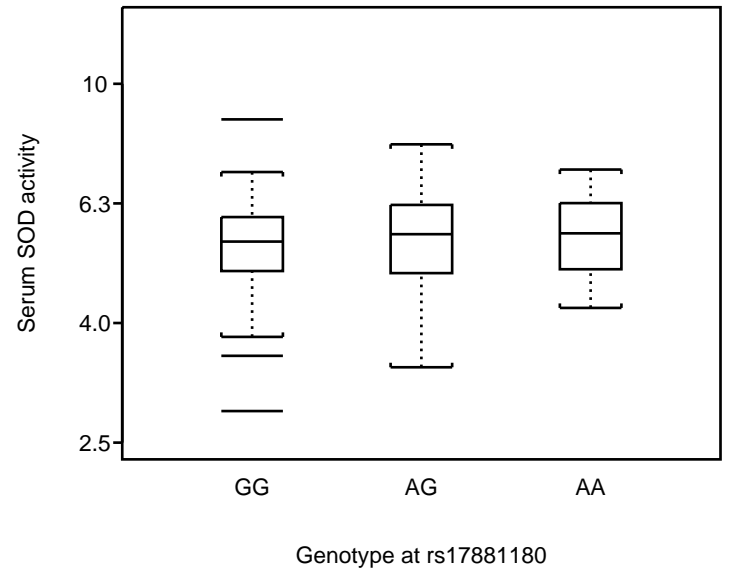

Probands

Relatives

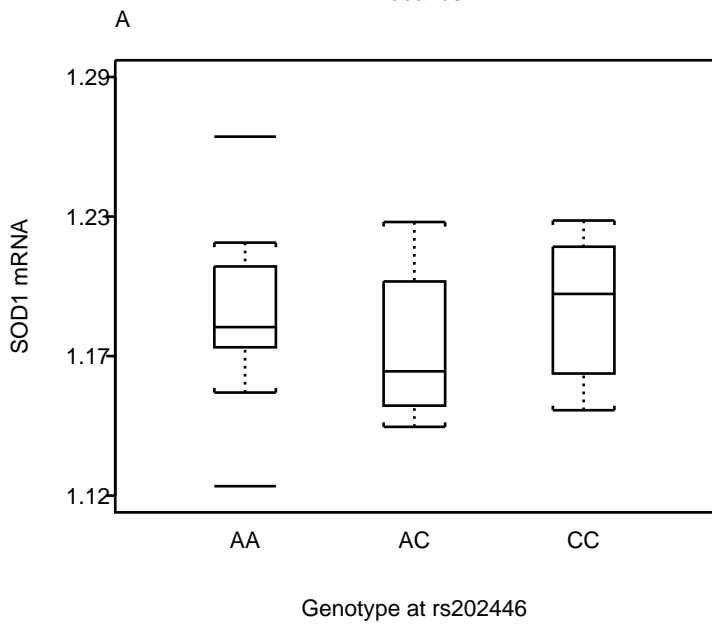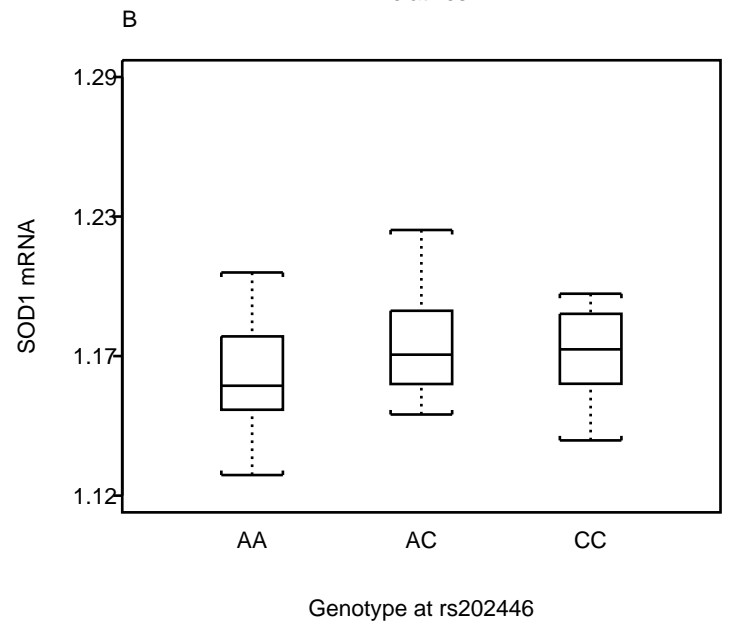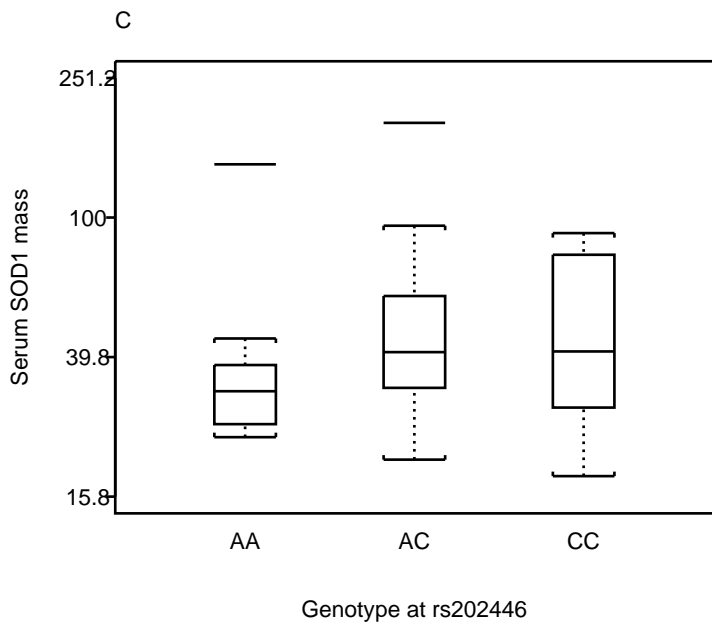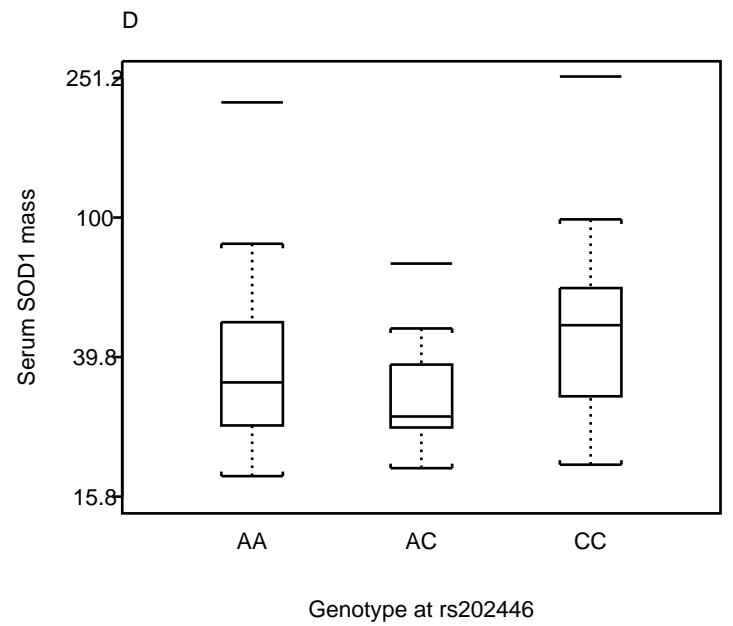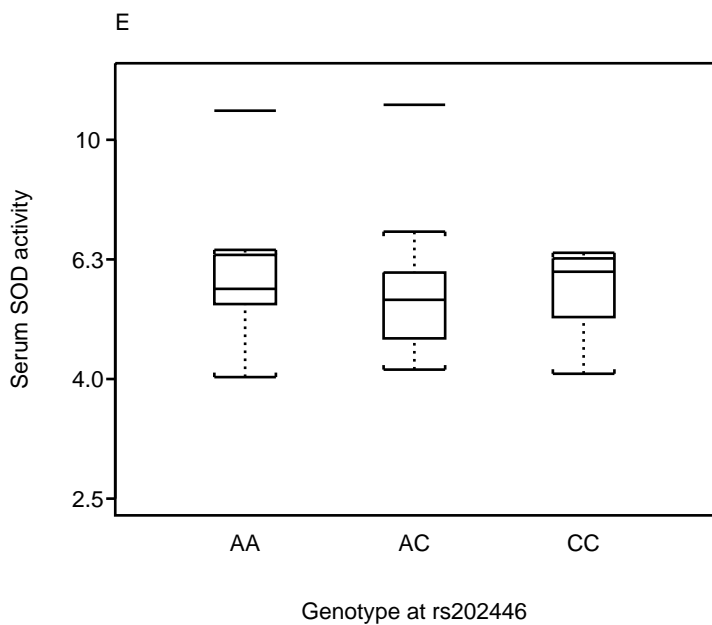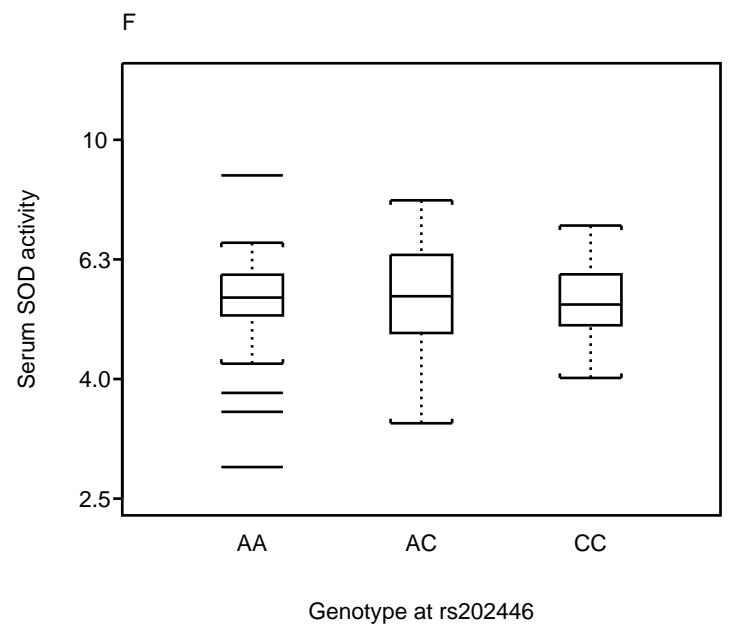

Probands

A

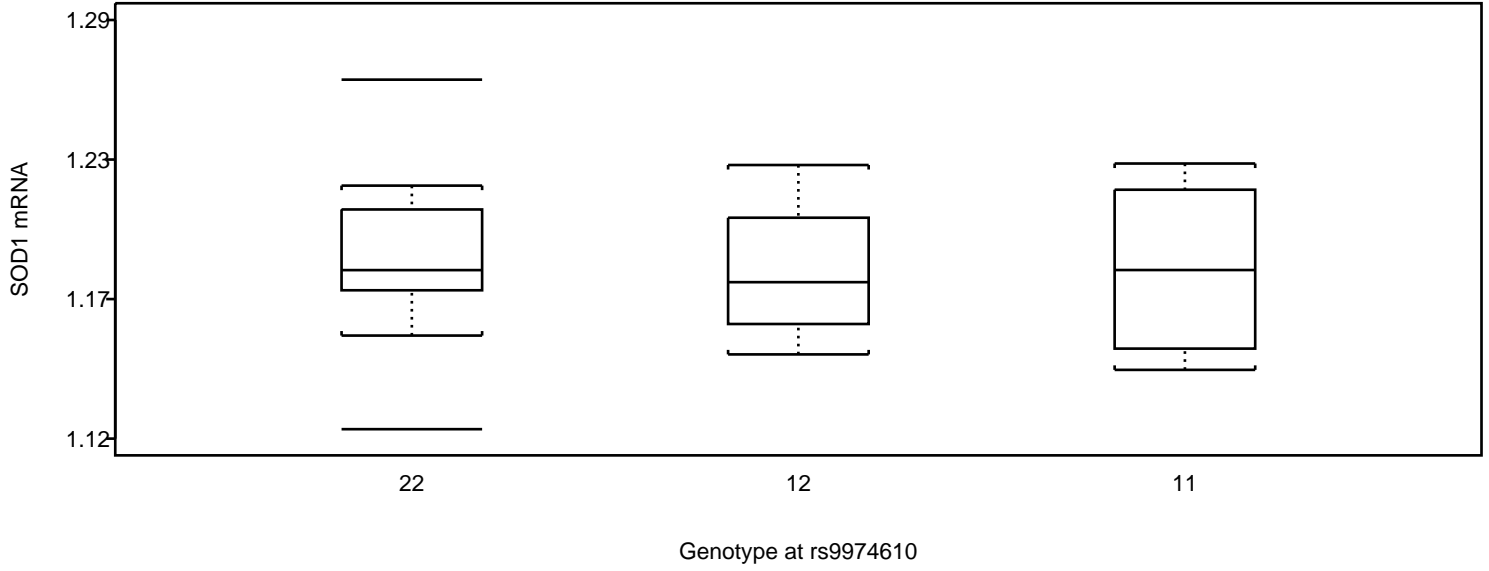

C

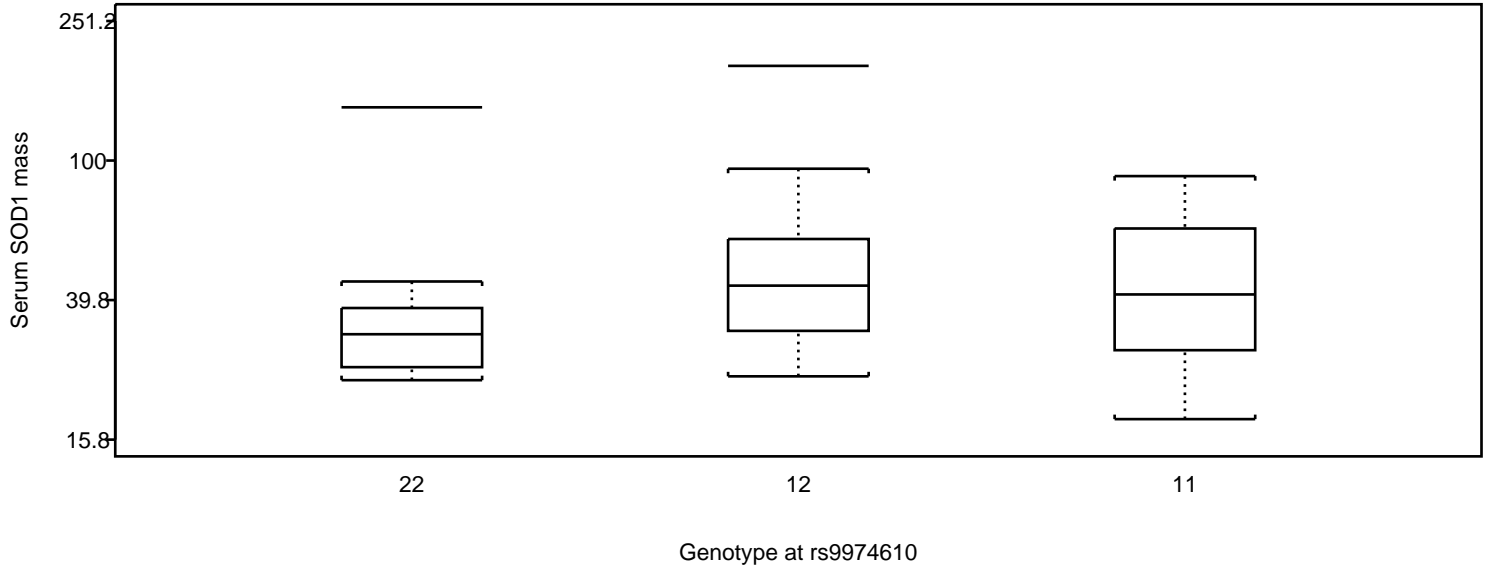

E

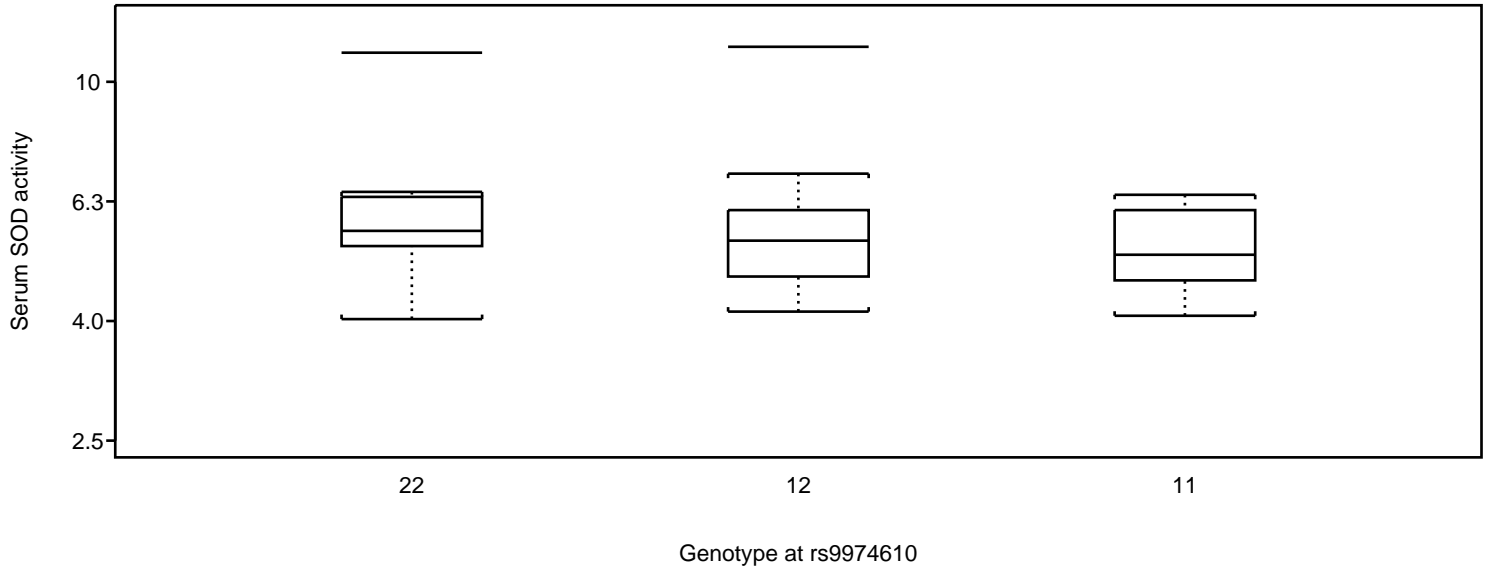

Probands

A

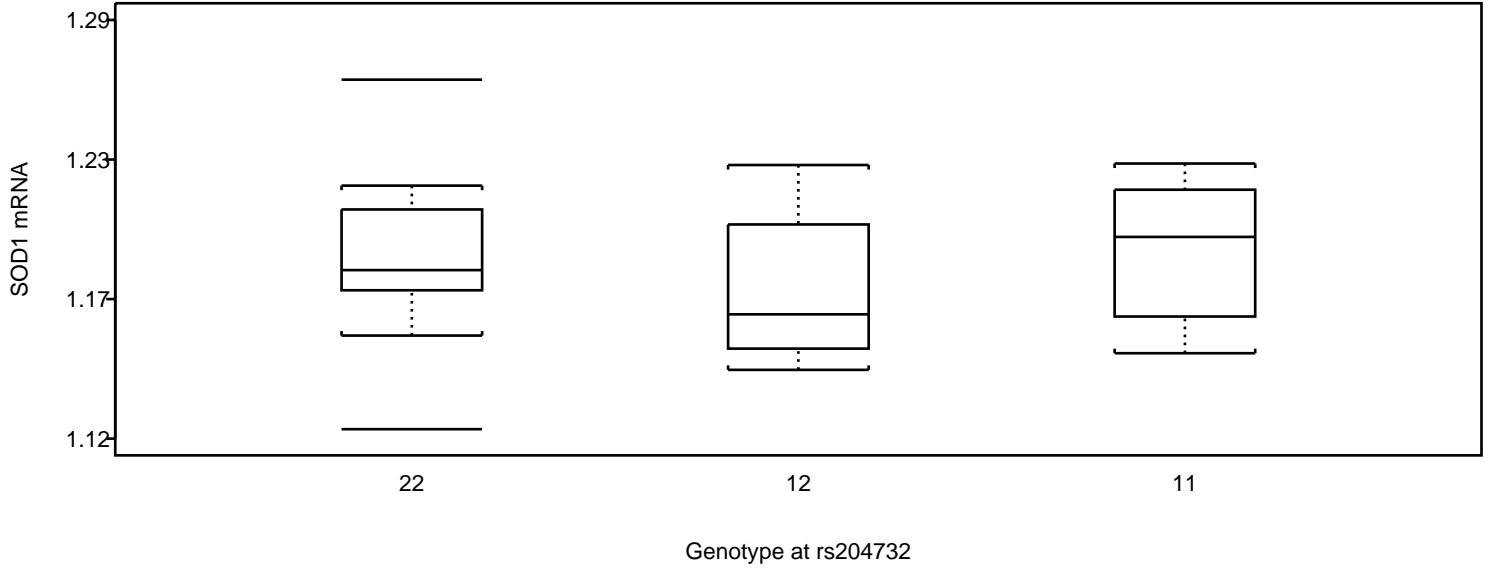

C

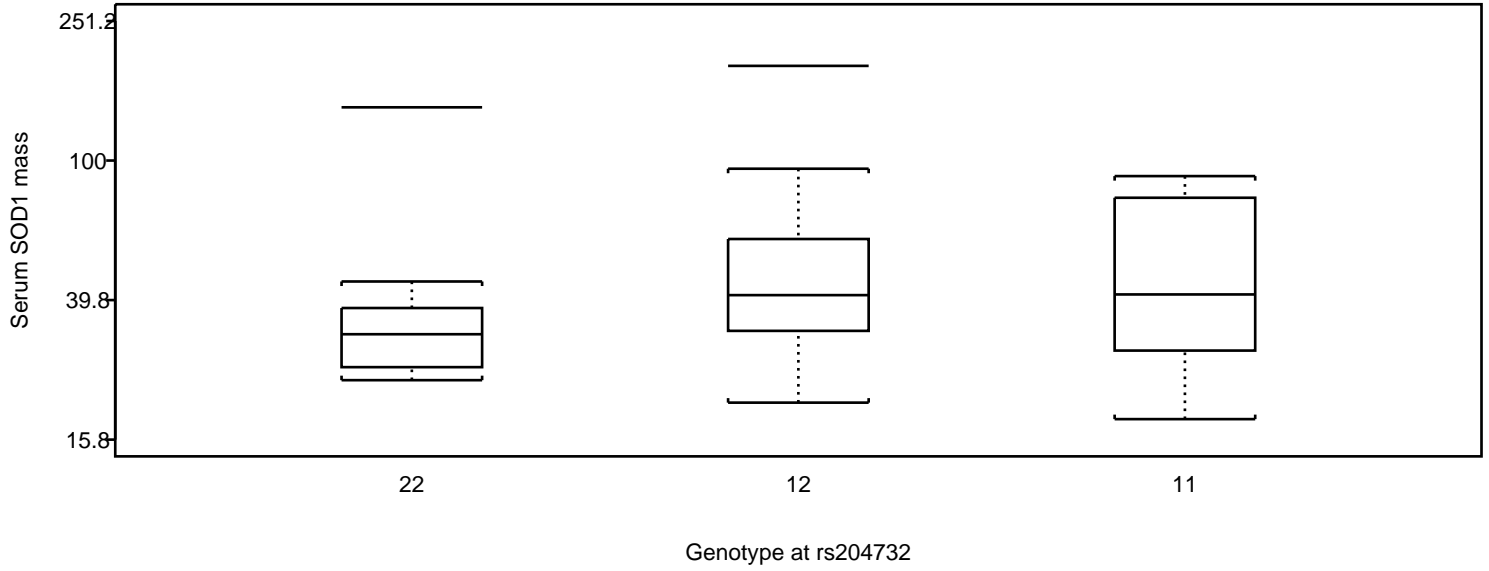

E

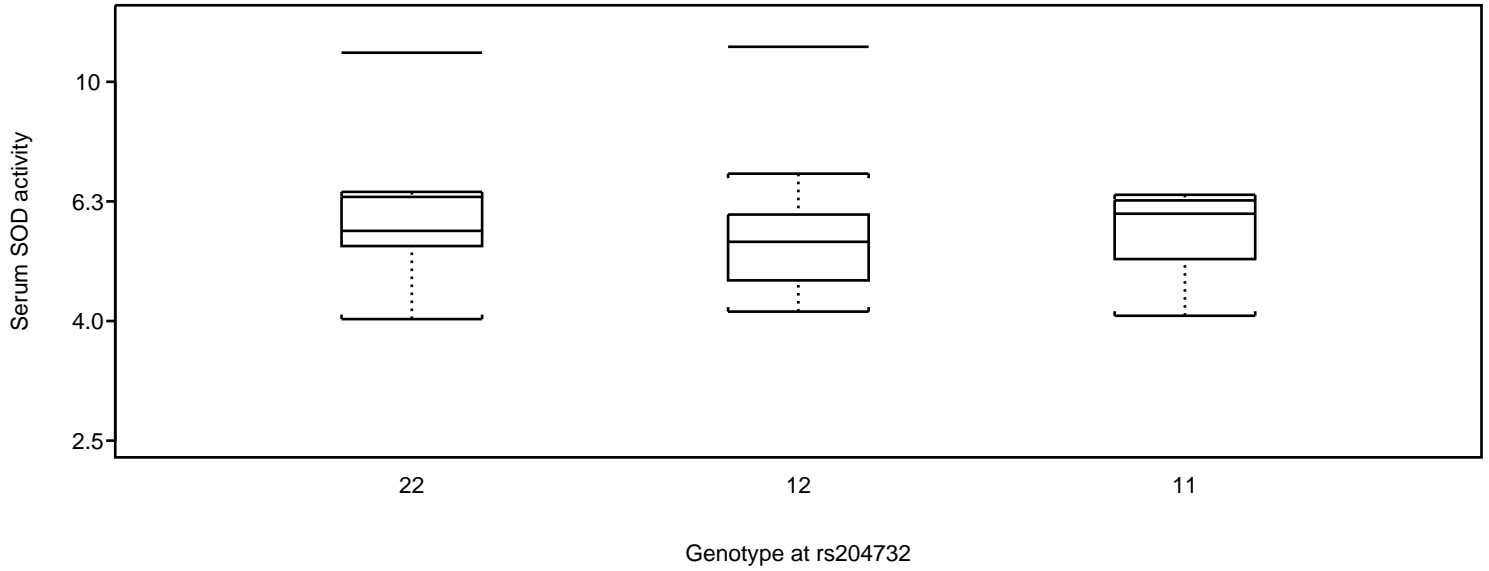

Supplement: db071059OLA30.pdf [file db071059OLA30.pdf]
